# Supplementary material for: A quick and versatile protocol for the 3D visualization of transgene expression across the whole body of larval Drosophila
Source: bioRxiv or medRxiv preprint supplement (doi:10.1101/2021.01.28.428398), 2021-01-28
Supplement: Supplementary file [file media-2.pdf]

**Kobler et al. (2021)** *A quick and versatile protocol for the 3D visualization of transgene expression across the whole body of larval Drosophila.*

**Supplementary Table 1: Imaging parameters**

Abbreviations: exc.: excitation; em.: emission; corr.: corrected; dyn.: dynamic; illumin.: illumination; exp.: exposure; l/s: lines per second

| Figure   | Fluorescence filter [nm] |        |              |        |              |         |        |         | Microscopy parameters |                     |            |              |             |      |         |            |                |                |                        |                |
|----------|--------------------------|--------|--------------|--------|--------------|---------|--------|---------|-----------------------|---------------------|------------|--------------|-------------|------|---------|------------|----------------|----------------|------------------------|----------------|
|          | Autofluorescence         |        | EGFP / Venus |        | mCherry-CAAX |         | mIFP   |         | Objective             |                     |            | Optical zoom | z-step [µm] | z #  | tiles # | dyn. focus | Illumin. sides | Exp. time [ms] | Acquisition time [min] | Data size [GB] |
|          | exc.                     | em.    | exc.         | em.    | exc.         | em.     | exc.   | em.     | Olympus zoombody      | Infinity corr. tube | Leica CLSM |              |             |      |         |            |                |                |                        |                |
| 1 A-C''  | 470/30                   | 520/40 | /            | /      | 570/20       | 625/30  | /      | /       | /                     | 4x                  | /          | 2            | 1           | 854  | 3       | yes        | 1              | 255            | 185                    | 40             |
| 2 A-A''  | /                        | /      | /            | /      | 595/20       | 625/30  | /      | /       | 2x                    | /                   | /          | 4            | 1           | 1191 | 4       | no         | 1              | 200            | 26                     | 37.2           |
| 2 B-B''  | 681/24                   | 720/24 | /            | /      | 595/20       | 625/30  | /      | /       | /                     | 12x                 | /          | 1            | 1           | 872  | 1       | no         | 1              | 162            | 8                      | 13.6           |
| 3 A-C''' | 530/30                   | 585/40 | /            | /      | /            | /       | 681/24 | 720/24  | /                     | 12x                 | /          | 1            | 1           | 1537 | 6       | yes        | 1              | 215            | 528                    | 144            |
| 4 A-B''  | /                        | /      | /            | /      | 595/20       | 625/30  | 681/24 | 720/24  | 2x                    | /                   | /          | 4            | 2           | 627  | 4       | no         | 1              | 300            | 34                     | 39.2           |
| 4 C-C''  | /                        | /      | /            | /      | 561          | 580-620 | 633    | 680-730 | /                     | /                   | 20x        | 3            | 0.5         | 366  | 1       | /          | /              | 400 l/s        | 96                     | 6.1            |
| 5 A-A''  | /                        | /      | 500/20       | 535/30 | 595/20       | 625/30  | 681/24 | 720/24  | /                     | 12x                 | /          | 1            | 1           | 1361 | 5       | yes        | 2              | 199            | 1113                   | 207            |
| 5 B-B''  | /                        | /      | 500/20       | 535/30 | 595/20       | 625/30  | 681/24 | 720/24  | /                     | 20x                 | /          | 1            | 1           | 959  | 3       | no         | 1              | 200            | 44                     | 67.5           |
| S2 A     | /                        | /      | 480/20       | 520/40 | /            | /       | /      | /       | /                     | 12x water           | /          | 1            | 1           | 375  | 1       | no         | 2              | 200            | 4                      | 2.9            |
| S2 B     | /                        | /      | 480/20       | 520/40 | /            | /       | /      | /       | /                     | 12x                 | /          | 1            | 1           | 811  | 4       | no         | 1              | 200            | 18                     | 25.4           |
| S2 C-D   | 595/20                   | 625/30 | 480/20       | 520/40 | /            | /       | /      | /       | /                     | 12x                 | /          | 1            | 1           | 986  | 5       | no         | 2              | 200            | 107                    | 77.1           |
| S3 A     | /                        | /      | /            | /      | /            | /       | 681/24 | 720/24  | 2                     | /                   | /          | 2.5          | 2           | 393  | 2       | no         | 1              | 200            | 8                      | 12.2           |
| S3 B     | /                        | /      | /            | /      | /            | /       | 681/24 | 720/24  | 2                     | /                   | /          | 2.5          | 2           | 648  | 3       | no         | 1              | 200            | 20                     | 30.4           |
| M 1      | As in Fig. 2 A-A''       |        |              |        |              |         |        |         |                       |                     |            |              |             |      |         |            |                |                |                        |                |
| M 2      | As in Fig. 2 B-B''       |        |              |        |              |         |        |         |                       |                     |            |              |             |      |         |            |                |                |                        |                |
| M 3      | As in Fig. 3 A-C'''      |        |              |        |              |         |        |         |                       |                     |            |              |             |      |         |            |                |                |                        |                |
| M 4      | /                        | /      | /            | /      | 595/20       | 625/30  | 681/24 | 720/24  | /                     | 20x                 | /          | 1            | 1           | 822  | 1       | no         | 1              | 300            | 17                     | 19.2           |
| M 5      | /                        | /      | /            | /      | 595/20       | 625/30  | 681/24 | 720/24  | /                     | 20x                 | /          | 2            | 1           | 256  | 1       | no         | 1              | 300            | 3                      | 4              |
| M 6      | As in Fig. 5 A-A''       |        |              |        |              |         |        |         |                       |                     |            |              |             |      |         |            |                |                |                        |                |
